# Supplementary material
Source: Research Square preprint supplement (doi:10.21203/rs.3.rs-8990819/v1)
Supplement: Supplementary file 1 [file d8f711c8d6dfb2200383c86f.docx]

# Supplementary Material 1

High Income Countries - World Bank. World Bank country and lending groups. 2023.

<https://datahelpdesk.worldbank.org/knowledgebase/articles/906519>. Accessed 26 Jun

2023.

1. Andorra,

2. Antigua &

Barbuda,

3. Aruba,

4. Australia,

5. Austria,

6. The Bahamas,

7. Bahrain,

Barbados,

8. Belgium,

9. British Virgin

Islands,

10. Brunei

Darussalam,

11. Canada,

12. Cayman Islands,

13. Channel Islands,

14. Chile,

15. Curacao,

16. Cyprus,

17. Czech Republic,

18. Denmark,

19. Estonia,

20. Farce Islands,

21. Finland,

22. France,

23. French

Polynesia,

24. Germany,

25. Gibraltar,

26. Greece,

27. Greenland,

28. Guam,

29. Hong Kong SAR

China,

30. Hungary,

31. Iceland,

32. Ireland,

33. Isle of Man,

34. Israel,

35. Italy,

36. Japan,

37. Korea Rep.,

38. Kuwait,

39. Latvia,

40. Liechtenstein,

41. Lithuania,

42. Luxembourg,

43. Macao SAR,

44. China,

45. Malta,

46. Monaco,

47. Nauru,

48. Netherlands,

49. New Caledonia,

50. New Zealand,

51. Northern

Mariana Islands,

52. Norway,

53. Oman,

54. Panama,

55. Poland,

56. Portugal,

57. Puerto Rico,

58. Qatar,

59. Romania,

60. San Maino,

61. Saudi Arabia,

62. Seychelles,

63. Singapore,

64. Sint Maarten

(Dutch Part),

65. Slovak Republic,

66. Slovenia,

67. St. Kitts and

Nevis,

68. St. Martin

(French Part),

69. Sweden,

70. Switzerland,

71. Taiwan China,

72. Trinidad and

Tobago,

73. Turks and

Caicos Islands,

74. United Arab

Emirates,

75. United Kingdom,

76. United States,

77. Uraguay,

78. Virgin Islands

(U.S)
